# Supplementary material for: New α- and γ-synuclein immunopathological lesions in human brain
Source: Springer Nature journal article supplement (doi:10.1186/s40478-014-0132-8), 2014-09-10
Supplement: MOESM5 [file 25658226]

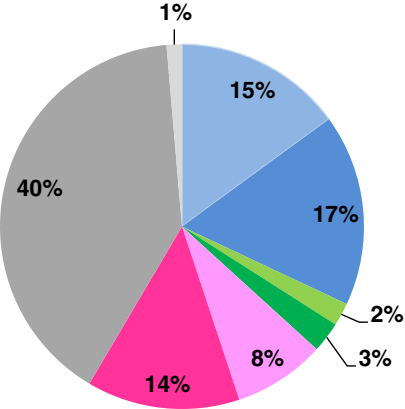

- Diffuse astrocytoma (II)
- Anaplastic astrocytoma (III)
- Oligodendroglioma (II)
- Anaplastic oligodendroglioma (III)
- Oligoastrocytoma (II)
- Anaplastic oligoastrocytoma (III)
- Primary glioblastoma (IV)
- Secondary glioblastoma (IV)
