# Supplementary material for: New α- and γ-synuclein immunopathological lesions in human brain
Source: Springer Nature journal article supplement (doi:10.1186/s40478-014-0132-8), 2014-09-10
Supplement: MOESM6 [file 25658226]

**Samples meeting  
selection criteria  
(n=147)**

**Successful DNA  
extraction  
(n=146)**

**Successful PCR  
experiments  
91% (n=133/146)**

**Samples from academic centers**  
**100% PCR success**  
**(n=103/103)**

**Commercial samples**  
**70 % PCR success**  
**(n=30/43)**
