# Supplementary figures and images for: New α- and γ-synuclein immunopathological lesions in human brain
Source: Springer Nature journal article supplement (doi:10.1186/s40478-014-0132-8), 2014-09-10

**b IDH1 R132H positive**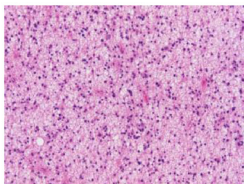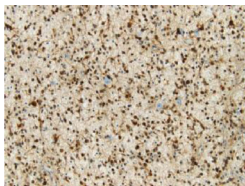**c****WT**

A T A G G T C G T

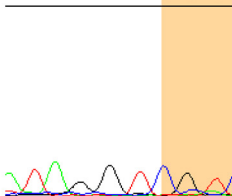**d****WT**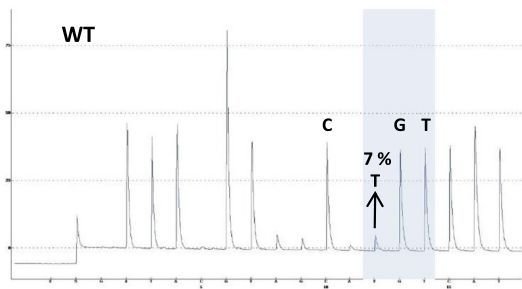**e**

**PCR Clamping**  
**WT**

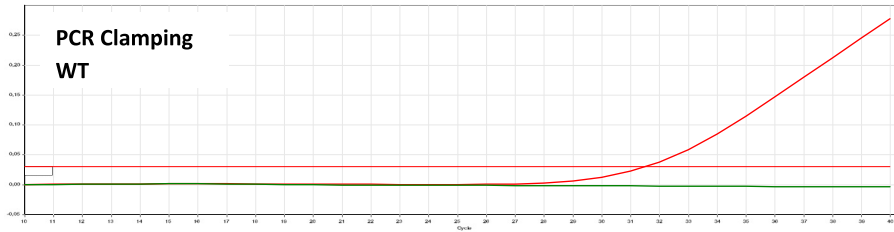**f**

**ARMS**  
**WT**

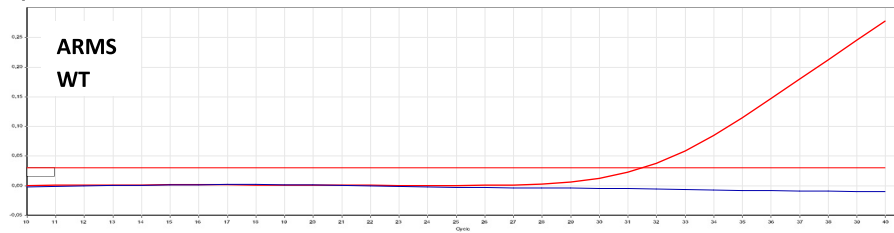

Supplement: MOESM7 [file 25658226]

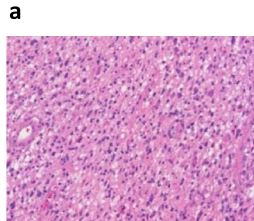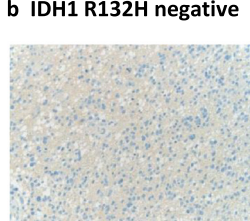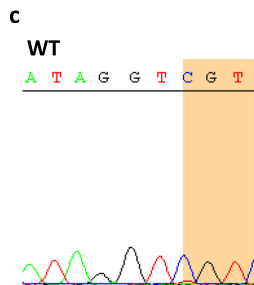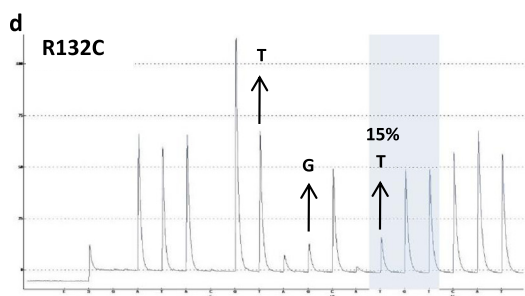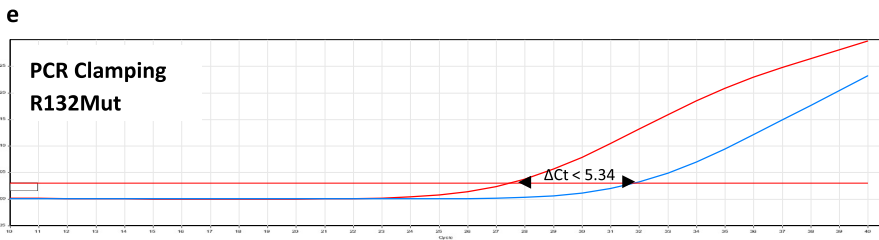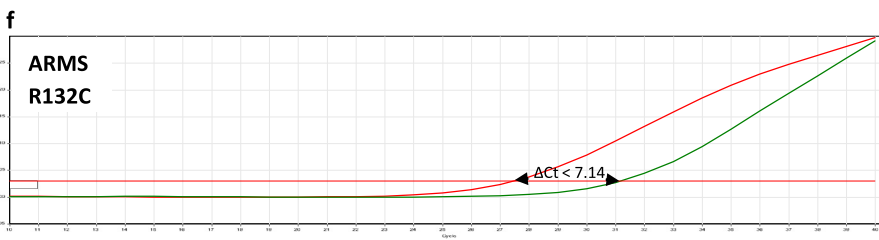

Supplement: MOESM8 [file 25658226]
